# Supplementary material
Source: PubMed Central journal article supplement (PMC8923810)
Supplement: NIHMS1785137-supplement-Supporting_Information.pdf [file NIHMS1785137-supplement-Supporting_Information.pdf]

Supporting Information:

# A Polarizable Water Model Derived from a Model Electron Density

*Joshua A. Rackers,<sup>1†</sup> Roseane R. Silva,<sup>1†</sup> Zhi Wang<sup>2</sup> and Jay W. Ponder<sup>2,3\*</sup>*

<sup>1</sup> Program in Computational & Molecular Biophysics, Washington University  
School of Medicine, Saint Louis, Missouri 63110, United States

<sup>2</sup> Department of Chemistry, Washington University in Saint Louis,  
Saint Louis, Missouri 63130, United States

<sup>3</sup> Department of Biochemistry & Molecular Biophysics, Washington University  
School of Medicine, Saint Louis, Missouri 63110

<sup>†</sup> These authors contributed equally to this work.

\* Corresponding author: ponder@dasher.wustl.edu

**Table S1.** Force Field Parameters for the HIPPO Water Model

| TERM               | PARAMETER                    | UNIT                                          | VALUE     |
|--------------------|------------------------------|-----------------------------------------------|-----------|
| Bond               | O-H Bond Length              | Å                                             | 0.9572    |
|                    | Bond Force Constant          | $kcal \cdot mol^{-1} \cdot \text{Å}^{-2}$     | 551.108   |
| Angle              | H-O-H Angle Value            | degree (°)                                    | 104.52    |
|                    | Angle Force Constant         | $kcal \cdot mol^{-1} \cdot rad^{-2}$          | 47.8253   |
| Atomic Multipole   | O Monopole                   | $e$                                           | -0.374842 |
|                    | O Dipole Z                   | $e \cdot bohr$                                | 0.054116  |
|                    | O Quadrupole XX              | $e \cdot bohr^2$                              | 0.680265  |
|                    | O Quadrupole YY              | $e \cdot bohr^2$                              | -0.611121 |
|                    | O Quadrupole ZZ              | $e \cdot bohr^2$                              | -0.069144 |
|                    | H Monopole                   | $e$                                           | 0.187421  |
|                    | H Dipole X                   | $e \cdot bohr$                                | 0.008106  |
|                    | H Dipole Z                   | $e \cdot bohr$                                | -0.200116 |
|                    | H Quadrupole XX              | $e \cdot bohr^2$                              | 0.066936  |
|                    | H Quadrupole YY              | $e \cdot bohr^2$                              | 0.043814  |
|                    | H Quadrupole ZZ              | $e \cdot bohr^2$                              | -0.11075  |
|                    | H Quadrupole XZ              | $e \cdot bohr^2$                              | 0.007338  |
| Pauli Repulsion    | O Size                       | $\sqrt{kcal \cdot mol^{-1} \cdot \text{Å}}$   | 23.0592   |
|                    | O $\alpha$ Damping           | Å <sup>-1</sup>                               | 4.41372   |
|                    | O Valence                    | $e$                                           | 3.37829   |
|                    | H Size                       | $\sqrt{kcal \cdot mol^{-1} \cdot \text{Å}}$   | 16.023    |
|                    | H $\alpha$ Damping           | Å <sup>-1</sup>                               | 4.92152   |
|                    | H Valence                    | $e$                                           | 0.63308   |
| Charge Penetration | O # Core Electrons           | None                                          | 6         |
|                    | O $\alpha$ Damping           | Å <sup>-1</sup>                               | 4.28982   |
|                    | H # Core Electrons           | None                                          | 1         |
|                    | H $\alpha$ Damping           | Å <sup>-1</sup>                               | 5.21764   |
| Dispersion         | O C <sub>6</sub> Coefficient | $\sqrt{kcal \cdot mol^{-1} \cdot \text{Å}^6}$ | 16.1193   |
|                    | O $\alpha$ Damping           | Å <sup>-1</sup>                               | 4.28982   |
|                    | H C <sub>6</sub> Coefficient | $\sqrt{kcal \cdot mol^{-1} \cdot \text{Å}^6}$ | 3.6813    |
|                    | H $\alpha$ Damping           | Å <sup>-1</sup>                               | 5.21764   |
| Polarization       | O Polarizability             | Å                                             | 0.725918  |
|                    | H Polarizability             | Å                                             | 0.359954  |
| Charge Transfer    | O Prefactor                  | $e^2 \cdot \text{Å}^{-1}$                     | 3.63984   |
|                    | O $\alpha$ Damping           | Å <sup>-1</sup>                               | 0         |
|                    | H Prefactor                  | $e^2 \cdot \text{Å}^{-1}$                     | 0         |
|                    | H $\alpha$ Damping           | Å <sup>-1</sup>                               | 3.2776    |
| Charge Flux (CF)   | CF Bond Length               | Å                                             | 0.9572    |
|                    | CF Bond Force Constant       | $e \cdot \text{Å}^{-1}$                       | -0.027265 |
|                    | CF Angle Value               | degree (°)                                    | 104.52    |
|                    | CF Angle Force Constant      | $e \cdot rad^{-1}$                            | 0.102621  |
|                    | CF Bond-Angle Constant       | $e \cdot \text{Å}^{-1}$                       | -0.039303 |

**Table S2.** Smith Dimer CCSD(T) CBS Energies vs. HIPPO and Selected Water Models.  
All energy values are in kcal/mol.

| DIMER | CCSD(T)<br>/CBS | HIPPO<br>(Single) | HIPPO<br>(Opt) | AMOEBA+<br>ChgFlux | AMOEBA<br>14 | AMOEBA<br>03 | iAMOEBA | TIP3P  |
|-------|-----------------|-------------------|----------------|--------------------|--------------|--------------|---------|--------|
| 1     | -4.967          | -4.917            | -4.957         | -4.854             | -4.644       | -4.956       | -5.092  | -6.024 |
| 2     | -4.459          | -4.330            | -4.339         | -4.247             | -4.144       | -4.389       | -4.478  | -5.510 |
| 3     | -4.410          | -4.232            | -4.238         | -4.122             | -4.118       | -4.314       | -4.474  | -5.752 |
| 4     | -4.281          | -4.378            | -4.574         | -4.221             | -3.848       | -3.724       | -3.856  | -4.251 |
| 5     | -4.034          | -3.994            | -4.193         | -3.701             | -3.498       | -3.401       | -3.460  | -3.587 |
| 6     | -3.991          | -3.823            | -3.913         | -3.431             | -3.360       | -3.248       | -3.298  | -3.684 |
| 7     | -3.168          | -3.090            | -3.121         | -2.886             | -2.352       | -2.794       | -2.863  | -3.693 |
| 8     | -1.425          | -1.354            | -1.377         | -1.416             | -0.989       | -1.462       | -1.414  | -1.388 |
| 9     | -3.208          | -3.169            | -3.184         | -2.965             | -2.420       | -2.932       | -3.427  | -4.605 |
| 10    | -2.286          | -2.278            | -2.295         | -2.164             | -1.779       | -2.122       | -2.728  | -4.040 |
| RMS   |                 | 0.101             | 0.129          | 0.269              | 0.538        | 0.390        | 0.367   | 1.016  |

**Table S3.** Smith Dimer Stationary Point Coordinates Optimized at MP2/aug-cc-pV5Z (Å)

## Water Dimer 1

|   |   |           |           |           |
|---|---|-----------|-----------|-----------|
| 1 | O | 0.867811  | 0.000000  | -1.203650 |
| 2 | H | 0.324645  | 0.000000  | -1.990082 |
| 3 | H | 0.240169  | 0.000000  | -0.471356 |
| 4 | O | -0.824511 | 0.000000  | 1.145226  |
| 5 | H | -0.626009 | 0.759085  | 1.694337  |
| 6 | H | -0.626009 | -0.759085 | 1.694337  |

## Water Dimer 2

|   |   |           |           |           |
|---|---|-----------|-----------|-----------|
| 1 | O | 0.789087  | -0.092190 | -1.267117 |
| 2 | H | 0.224701  | 0.014459  | -2.030818 |
| 3 | H | 0.188557  | -0.098628 | -0.513676 |
| 4 | O | -0.698068 | 0.045728  | 1.224131  |
| 5 | H | -1.622580 | 0.146691  | 1.448936  |
| 6 | H | -0.235228 | 0.674859  | 1.777784  |

## Water Dimer 3

|   |   |           |           |          |
|---|---|-----------|-----------|----------|
| 1 | O | -0.777272 | -1.287171 | 0.000000 |
| 2 | H | -0.198888 | -2.047722 | 0.000000 |
| 3 | H | -0.185961 | -0.527199 | 0.000000 |
| 4 | O | 0.695025  | 1.224519  | 0.000000 |
| 5 | H | 0.110214  | 1.981948  | 0.000000 |
| 6 | H | 1.579959  | 1.587303  | 0.000000 |

## Water Dimer 4

|   |   |           |           |           |
|---|---|-----------|-----------|-----------|
| 1 | O | -0.091509 | -0.685060 | -1.217748 |
| 2 | H | -0.682702 | -0.634116 | -1.967731 |
| 3 | H | -0.660630 | -0.651495 | -0.445365 |
| 4 | O | 0.091509  | 0.685060  | 1.217748  |
| 5 | H | 0.682702  | 0.634116  | 1.967731  |
| 6 | H | 0.660630  | 0.651495  | 0.445365  |

## Water Dimer 5

|   |   |           |           |           |
|---|---|-----------|-----------|-----------|
| 1 | O | -0.283054 | 0.357940  | -1.308251 |
| 2 | H | -0.875503 | 0.262511  | -2.052579 |
| 3 | H | -0.845473 | 0.329558  | -0.531050 |
| 4 | O | 0.300075  | -0.308066 | 1.317241  |
| 5 | H | 0.639378  | -0.960931 | 1.927788  |
| 6 | H | 0.811455  | -0.422669 | 0.513166  |

## Water Dimer 6

|   |   |           |           |           |
|---|---|-----------|-----------|-----------|
| 1 | O | 0.339146  | -1.331260 | 0.000002  |
| 2 | H | 0.928501  | -2.083902 | -0.000031 |
| 3 | H | 0.909760  | -0.559894 | 0.000006  |
| 4 | O | -0.339146 | 1.331260  | 0.000002  |
| 5 | H | -0.928501 | 2.083902  | -0.000031 |
| 6 | H | -0.909760 | 0.559894  | 0.000006  |

Water Dimer 7

|   |   |           |           |           |
|---|---|-----------|-----------|-----------|
| 1 | O | -0.785836 | 0.000024  | 1.181640  |
| 2 | H | -1.574007 | -0.003265 | 0.637789  |
| 3 | H | -1.109620 | 0.000454  | 2.082238  |
| 4 | O | 0.863223  | 0.000463  | -1.267227 |
| 5 | H | 0.731698  | -0.747337 | -0.683651 |
| 6 | H | 0.723746  | 0.742424  | -0.678047 |

Water Dimer 8

|   |   |           |           |           |
|---|---|-----------|-----------|-----------|
| 1 | O | 1.053603  | 1.285792  | 0.000191  |
| 2 | H | 0.467832  | 1.360914  | -0.753108 |
| 3 | H | 0.463133  | 1.358092  | 0.750088  |
| 4 | O | -1.053603 | -1.285792 | 0.000191  |
| 5 | H | -0.467832 | -1.360914 | -0.753108 |
| 6 | H | -0.463133 | -1.358092 | 0.750088  |

Water Dimer 9

|   |   |           |           |           |
|---|---|-----------|-----------|-----------|
| 1 | O | 1.575300  | 0.000000  | -0.013799 |
| 2 | H | 0.938355  | -0.000034 | -0.728916 |
| 3 | H | 1.006338  | 0.000092  | 0.756168  |
| 4 | O | -1.442383 | -0.000006 | 0.011432  |
| 5 | H | -2.027063 | 0.757805  | 0.005212  |
| 6 | H | -2.027120 | -0.757772 | 0.005097  |

Water Dimer 10

|   |   |           |           |           |
|---|---|-----------|-----------|-----------|
| 1 | O | -0.002641 | -1.517670 | -0.000005 |
| 2 | H | -0.754700 | -2.109631 | -0.000027 |
| 3 | H | 0.757286  | -2.099507 | 0.000047  |
| 4 | O | 0.002535  | 1.650701  | 0.000003  |
| 5 | H | 0.743716  | 1.045225  | -0.000030 |
| 6 | H | -0.744615 | 1.052616  | 0.000046  |

**Table S4.** Water Dimer HIPPO and SAPT Energy Components (kcal/mol)

| DIMER | ELECTROSTATICS |        | REPULSION |       | INDUCTION |        | DISPERSION |        |
|-------|----------------|--------|-----------|-------|-----------|--------|------------|--------|
|       | HIPPO          | SAPT   | HIPPO     | SAPT  | HIPPO     | SAPT   | HIPPO      | SAPT   |
| 1     | -8.633         | -8.624 | 8.373     | 8.340 | -3.167    | -2.115 | -1.522     | -1.820 |
| 2     | -7.389         | -7.289 | 7.351     | 7.142 | -2.890    | -1.924 | -1.433     | -1.707 |
| 3     | -6.949         | -6.741 | 6.865     | 6.506 | -2.786    | -1.855 | -1.394     | -1.660 |
| 4     | -7.191         | -6.790 | 6.318     | 5.557 | -1.977    | -0.701 | -1.553     | -1.707 |
| 5     | -6.588         | -5.915 | 6.043     | 4.801 | -1.927    | -0.710 | -1.550     | -1.665 |
| 6     | -6.311         | -5.419 | 5.901     | 4.265 | -1.890    | -0.784 | -1.554     | -1.652 |
| 7     | -4.640         | -4.577 | 3.442     | 3.398 | -0.993    | -0.577 | -0.987     | -1.184 |
| 8     | -1.668         | -1.913 | 1.033     | 1.454 | -0.245    | -0.242 | -0.506     | -0.655 |
| 9     | -4.435         | -4.437 | 3.014     | 3.136 | -0.990    | -0.593 | -0.867     | -1.074 |
| 10    | -2.777         | -2.786 | 1.700     | 1.918 | -0.645    | -0.486 | -0.646     | -0.812 |

| DIMER | TOTAL ENERGY |        |         |
|-------|--------------|--------|---------|
|       | HIPPO        | SAPT   | CCSD(T) |
| 1     | -4.917       | -4.219 | -4.967  |
| 2     | -4.330       | -3.778 | -4.459  |
| 3     | -4.232       | -3.750 | -4.410  |
| 4     | -4.378       | -3.641 | -4.281  |
| 5     | -3.994       | -3.489 | -4.034  |
| 6     | -3.823       | -3.590 | -3.991  |
| 7     | -3.090       | -2.940 | -3.168  |
| 8     | -1.354       | -1.356 | -1.425  |
| 9     | -3.169       | -2.968 | -3.208  |
| 10    | -2.278       | -2.167 | -2.286  |

| MEAN ABSOLUTE DEVIATION FROM SAPT |       |
|-----------------------------------|-------|
| Electrostatics                    | 0.260 |
| Repulsion                         | 0.504 |
| Induction                         | 0.752 |
| Dispersion                        | 0.192 |
| Total                             | 0.367 |

**Table S5.** Liquid Water Density (kg/m<sup>3</sup>) vs. Temperature (K)

| <b>TEMP</b> | <b>HIPPO</b> | <b>EXPT</b> | <b>% Error</b> |
|-------------|--------------|-------------|----------------|
| 248.15      | 989.78       | 989.59      | 0.02           |
| 250.15      | 991.09       | 991.17      | -0.01          |
| 253.15      | 992.88       | 993.55      | -0.07          |
| 258.15      | 995.39       | 996.28      | -0.09          |
| 260.15      | 996.39       | 997.02      | -0.06          |
| 263.15      | 997.29       | 998.12      | -0.08          |
| 268.15      | 998.49       | 999.26      | -0.08          |
| 270.15      | 998.76       | 999.55      | -0.08          |
| 273.15      | 999.13       | 999.84      | -0.07          |
| 277.15      | 999.37       | 999.97      | -0.06          |
| 280.15      | 999.38       | 999.90      | -0.05          |
| 283.15      | 999.18       | 999.70      | -0.05          |
| 288.15      | 998.63       | 999.10      | -0.05          |
| 290.15      | 998.37       | 998.77      | -0.04          |
| 293.15      | 997.70       | 998.20      | -0.05          |
| 298.15      | 996.49       | 997.04      | -0.05          |
| 300.15      | 995.98       | 996.51      | -0.05          |
| 303.15      | 994.93       | 995.65      | -0.07          |
| 308.15      | 993.23       | 994.03      | -0.08          |
| 310.15      | 992.37       | 993.33      | -0.10          |
| 313.15      | 991.21       | 992.22      | -0.10          |
| 318.15      | 989.04       | 990.21      | -0.12          |
| 320.15      | 987.96       | 989.36      | -0.14          |
| 323.15      | 986.51       | 988.04      | -0.15          |
| 328.15      | 983.94       | 985.70      | -0.18          |
| 330.15      | 982.65       | 984.71      | -0.21          |
| 333.15      | 980.98       | 983.20      | -0.23          |
| 336.15      | 979.18       | 981.63      | -0.25          |
| 338.15      | 978.01       | 980.55      | -0.26          |
| 340.15      | 976.64       | 979.46      | -0.29          |
| 343.15      | 974.89       | 977.77      | -0.29          |
| 348.15      | 971.48       | 974.85      | -0.35          |
| 350.15      | 969.91       | 973.64      | -0.38          |
| 353.15      | 967.86       | 971.80      | -0.41          |
| 358.15      | 964.20       | 968.62      | -0.46          |
| 360.15      | 962.48       | 967.31      | -0.50          |
| 363.15      | 960.32       | 965.32      | -0.52          |
| 368.15      | 956.26       | 961.90      | -0.59          |
| 370.15      | 954.58       | 960.50      | -0.62          |
| 373.15      | 952.01       | 958.36      | -0.66          |

**Table S6.** Liquid Water Heat of Vaporization (kJ/mol) vs. Temperature (K)

| <b>TEMP</b> | <b>HIPPO</b> | <b>HIPPO Corrected</b> | <b>EXPT</b> | <b>% Error</b> |
|-------------|--------------|------------------------|-------------|----------------|
| 248.15      | 47.01        | –                      | 46.15       | 1.85           |
| 250.15      | 46.82        | 46.05                  | 46.06       | 1.65           |
| 253.15      | 46.59        | 45.85                  | 45.92       | 1.46           |
| 258.15      | 46.26        | 45.58                  | 45.70       | 1.23           |
| 260.15      | 46.10        | 45.44                  | 45.61       | 1.07           |
| 263.15      | 45.99        | 45.36                  | 45.48       | 1.12           |
| 268.15      | 45.57        | 44.99                  | 45.27       | 0.66           |
| 270.15      | 45.45        | 44.90                  | 45.18       | 0.61           |
| 273.15      | 45.27        | 44.76                  | 45.05       | 0.49           |
| 277.15      | 44.98        | 44.50                  | 44.88       | 0.22           |
| 280.15      | 44.89        | 44.44                  | 44.76       | 0.29           |
| 283.15      | 44.72        | 44.30                  | 44.63       | 0.20           |
| 288.15      | 44.33        | 43.97                  | 44.42       | -0.19          |
| 290.15      | 44.22        | 43.88                  | 44.33       | -0.24          |
| 293.15      | 44.03        | 43.71                  | 44.20       | -0.40          |
| 298.15      | 43.82        | 43.55                  | 43.99       | -0.38          |
| 300.15      | 43.61        | 43.35                  | 43.90       | -0.68          |
| 303.15      | 43.47        | 43.24                  | 43.78       | -0.71          |
| 308.15      | 43.23        | 43.05                  | 43.56       | -0.76          |
| 310.15      | 42.99        | 42.83                  | 43.47       | -1.11          |
| 313.15      | 42.94        | 42.80                  | 43.35       | -0.94          |
| 318.15      | 42.54        | 42.45                  | 43.13       | -1.36          |
| 320.15      | 42.43        | 42.36                  | 43.04       | -1.42          |
| 323.15      | 42.26        | 42.21                  | 42.91       | -1.51          |
| 328.15      | 41.99        | 41.99                  | 42.70       | -1.64          |
| 330.15      | 41.91        | 41.92                  | 42.61       | -1.63          |
| 333.15      | 41.67        | 41.70                  | 42.48       | -1.90          |
| 336.15      | 41.56        | 41.62                  | 42.34       | -1.86          |
| 338.15      | 41.41        | 41.49                  | 42.26       | -1.99          |
| 340.15      | 41.31        | 41.40                  | 42.17       | -2.03          |
| 343.15      | 41.12        | 41.23                  | 42.03       | -2.17          |
| 348.15      | 40.84        | 40.99                  | 41.81       | -2.32          |
| 350.15      | 40.82        | 40.99                  | 41.72       | -2.14          |
| 353.15      | 40.66        | 40.85                  | 41.58       | -2.22          |
| 358.15      | 40.30        | 40.53                  | 41.35       | -2.54          |
| 360.15      | 40.23        | 40.48                  | 41.26       | -2.48          |
| 363.15      | 40.09        | 40.35                  | 41.12       | -2.51          |
| 368.15      | 39.90        | 40.20                  | 40.88       | -2.41          |
| 370.15      | 39.70        | 40.02                  | 40.79       | -2.67          |
| 373.15      | 39.53        | 39.86                  | 40.65       | -2.77          |



**Table S7.** Liquid Water Dielectric Constant vs. Temperature (K)

| <b>TEMP</b> | <b>HIPPO</b> | <b>EXPT</b> | <b>% Error</b> |
|-------------|--------------|-------------|----------------|
| 248.15      | 98.30        | 99.15       | -0.86          |
| 250.15      | 95.68        | 98.13       | -2.49          |
| 253.15      | 95.09        | 96.58       | -1.54          |
| 258.15      | 94.94        | 94.24       | 0.74           |
| 260.15      | 94.19        | 93.34       | 0.91           |
| 263.15      | 92.55        | 92.04       | 0.55           |
| 268.15      | 91.13        | 89.94       | 1.32           |
| 270.15      | 89.84        | 89.12       | 0.80           |
| 273.15      | 91.38        | 87.90       | 3.96           |
| 277.15      | 87.43        | 86.31       | 1.30           |
| 280.15      | 85.14        | 85.14       | 0.00           |
| 283.15      | 85.53        | 83.98       | 1.84           |
| 288.15      | 81.89        | 82.08       | -0.24          |
| 290.15      | 79.42        | 81.33       | -2.35          |
| 293.15      | 78.26        | 80.22       | -2.44          |
| 298.15      | 76.88        | 78.41       | -1.95          |
| 300.15      | 75.64        | 77.70       | -2.65          |
| 303.15      | 74.56        | 76.64       | -2.71          |
| 308.15      | 71.70        | 74.90       | -4.27          |
| 310.15      | 72.43        | 74.22       | -2.41          |
| 313.15      | 70.27        | 73.20       | -4.01          |
| 318.15      | 68.48        | 71.54       | -4.28          |
| 320.15      | 68.69        | 70.89       | -3.10          |
| 323.15      | 66.34        | 69.92       | -5.11          |
| 328.15      | 66.12        | 68.33       | -3.24          |
| 330.15      | 65.03        | 67.70       | -3.94          |
| 333.15      | 64.09        | 66.77       | -4.02          |
| 336.15      | 62.97        | 65.86       | -4.39          |
| 338.15      | 61.69        | 65.26       | -5.47          |
| 340.15      | 60.10        | 64.66       | -7.05          |
| 343.15      | 60.61        | 63.77       | -4.96          |
| 348.15      | 59.30        | 62.32       | -4.85          |
| 350.15      | 58.23        | 61.75       | -5.71          |
| 353.15      | 56.67        | 60.90       | -6.94          |
| 358.15      | 55.87        | 59.51       | -6.11          |
| 360.15      | 55.40        | 58.96       | -6.04          |
| 363.15      | 54.43        | 58.15       | -6.40          |
| 368.15      | 52.65        | 56.83       | -7.36          |
| 370.15      | 52.59        | 56.30       | -6.58          |
| 373.15      | 51.25        | 55.52       | -7.69          |

**Table S8.** Liquid Water Self-Diffusion Coefficient ( $\times 10^{-5}$  cm<sup>2</sup>/s) vs. Temperature (K)

| <b>TEMP</b> | <b>HIPPO</b> | <b>EXPT</b> | <b>% Error</b> |
|-------------|--------------|-------------|----------------|
| 248.15      | 0.404        | 0.319       | 26.65          |
| 253.15      | 0.530        | 0.421       | 25.89          |
| 258.15      | 0.680        | 0.539       | 26.16          |
| 263.15      | 0.847        | 0.683       | 24.01          |
| 268.15      | 1.033        | 0.888       | 16.33          |
| 273.15      | 1.239        | 1.099       | 12.74          |
| 277.15      | 1.418        | 1.261       | 12.45          |
| 278.15      | 1.464        | 1.303       | 12.36          |
| 283.15      | 1.722        | 1.525       | 12.92          |
| 288.15      | 1.970        | 1.765       | 11.61          |
| 293.15      | 2.252        | 2.023       | 11.32          |
| 298.15      | 2.557        | 2.299       | 11.22          |
| 303.15      | 2.877        | 2.594       | 10.91          |
| 308.15      | 3.216        | 2.907       | 10.63          |
| 313.15      | 3.560        | 3.238       | 9.94           |
| 318.15      | 3.925        | 3.588       | 9.39           |
| 328.15      | 4.718        | 4.345       | 8.58           |
| 336.15      | 5.406        | 5.008       | 7.95           |
| 338.15      | 5.586        | 5.181       | 7.82           |
| 343.15      | 6.023        | 5.615       | 7.27           |
| 348.15      | 6.495        | 6.086       | 6.72           |
| 353.15      | 6.993        | 6.557       | 6.65           |
| 358.15      | 7.494        | 7.066       | 6.06           |
| 363.15      | 7.981        | 7.574       | 5.37           |
| 368.15      | 8.498        | 8.120       | 4.66           |
| 373.15      | 9.052        | 8.667       | 4.44           |

**Table S9.** Liquid Water Isobaric Heat Capacity (cal/mol/K) vs. Temperature (K)

| <b>TEMP</b> | <b>HIPPO</b> | <b>EXPT</b> | <b>% Error</b> |
|-------------|--------------|-------------|----------------|
| 248.15      | 23.322       | 19.256      | 21.12          |
| 250.15      | 23.130       | 19.077      | 21.25          |
| 253.15      | 22.858       | 18.777      | 21.73          |
| 258.15      | 22.446       | 18.494      | 21.37          |
| 260.15      | 22.294       | 18.418      | 21.04          |
| 263.15      | 22.079       | 18.330      | 20.45          |
| 268.15      | 21.753       | 18.228      | 19.34          |
| 270.15      | 21.633       | 18.197      | 18.88          |
| 273.15      | 21.462       | 18.157      | 18.20          |
| 277.15      | 21.251       | 18.115      | 17.31          |
| 280.15      | 21.105       | 18.089      | 16.67          |
| 283.15      | 20.967       | 18.066      | 16.06          |
| 288.15      | 20.754       | 18.036      | 15.07          |
| 290.15      | 20.675       | 18.026      | 14.70          |
| 293.15      | 20.560       | 18.015      | 14.13          |
| 298.15      | 20.382       | 18.002      | 13.22          |
| 300.15      | 20.315       | 17.999      | 12.87          |
| 303.15      | 20.217       | 17.997      | 12.34          |
| 308.15      | 20.063       | 17.995      | 11.49          |
| 310.15      | 20.004       | 17.995      | 11.16          |
| 313.15      | 19.918       | 17.996      | 10.68          |
| 318.15      | 19.781       | 18.000      | 9.89           |
| 320.15      | 19.728       | 18.001      | 9.59           |
| 323.15      | 19.651       | 18.004      | 9.15           |
| 328.15      | 19.528       | 18.010      | 8.43           |
| 330.15      | 19.480       | 18.013      | 8.14           |
| 333.15      | 19.411       | 18.018      | 7.73           |
| 336.15      | 19.344       | 18.024      | 7.32           |
| 338.15      | 19.302       | 18.028      | 7.07           |
| 340.15      | 19.260       | 18.033      | 6.80           |
| 343.15      | 19.200       | 18.041      | 6.42           |
| 348.15      | 19.108       | 18.055      | 5.83           |
| 350.15      | 19.074       | 18.061      | 5.61           |
| 353.15      | 19.027       | 18.071      | 5.29           |
| 358.15      | 18.959       | 18.090      | 4.80           |
| 360.15      | 18.936       | 18.097      | 4.64           |
| 363.15      | 18.907       | 18.109      | 4.41           |
| 368.15      | 18.874       | 18.130      | 4.10           |
| 370.15      | 18.867       | 18.138      | 4.02           |
| 373.15      | 18.863       | 18.151      | 3.92           |

**Table S10.** Liquid Water Isothermal Compressibility ( $\times 10^{-6}$  bar) vs. Temperature (K)

| <b>TEMP</b> | <b>HIPPO</b> | <b>EXPT</b> | <b>% Error</b> |
|-------------|--------------|-------------|----------------|
| 248.15      | 59.311       | 70.940      | -16.39         |
| 250.15      | 63.921       | 68.264      | -6.36          |
| 253.15      | 60.385       | 64.250      | -6.02          |
| 258.15      | 56.026       | 59.440      | -5.74          |
| 260.15      | 55.788       | 57.996      | -3.81          |
| 263.15      | 55.795       | 55.830      | -0.06          |
| 268.15      | 53.698       | 53.060      | 1.20           |
| 270.15      | 54.836       | 52.120      | 5.21           |
| 273.15      | 51.639       | 50.885      | 1.48           |
| 277.15      | 50.844       | 49.481      | 2.75           |
| 280.15      | 50.873       | 48.587      | 4.70           |
| 283.15      | 50.536       | 47.809      | 5.70           |
| 288.15      | 49.173       | 46.733      | 5.22           |
| 290.15      | 48.187       | 46.371      | 3.92           |
| 293.15      | 49.372       | 45.892      | 7.58           |
| 298.15      | 46.531       | 45.247      | 2.84           |
| 300.15      | 48.753       | 45.038      | 8.25           |
| 303.15      | 48.025       | 44.771      | 7.27           |
| 308.15      | 48.877       | 44.440      | 9.98           |
| 310.15      | 49.696       | 44.345      | 12.07          |
| 313.15      | 48.212       | 44.239      | 8.98           |
| 318.15      | 47.699       | 44.154      | 8.03           |
| 320.15      | 48.083       | 44.149      | 8.91           |
| 323.15      | 50.002       | 44.173      | 13.20          |
| 328.15      | 49.943       | 44.290      | 12.76          |
| 330.15      | 49.784       | 44.362      | 12.22          |
| 333.15      | 50.086       | 44.496      | 12.56          |
| 336.15      | 48.474       | 44.662      | 8.54           |
| 338.15      | 49.420       | 44.788      | 10.34          |
| 340.15      | 51.367       | 44.928      | 14.33          |
| 343.15      | 51.174       | 45.162      | 13.31          |
| 348.15      | 51.664       | 45.614      | 13.26          |
| 350.15      | 51.650       | 45.817      | 12.73          |
| 353.15      | 52.177       | 46.143      | 13.08          |
| 358.15      | 52.864       | 46.748      | 13.08          |
| 360.15      | 52.590       | 47.011      | 11.87          |
| 363.15      | 54.047       | 47.429      | 13.95          |
| 368.15      | 55.407       | 48.185      | 14.99          |
| 370.15      | 55.531       | 48.509      | 14.48          |
| 373.15      | 57.852       | 49.019      | 18.02          |

**Table S11.** Liquid Water Thermal Expansion Coefficient ( $\times 10^{-4}/\text{K}$ ) vs. Temperature (K)

| <b>TEMP</b> | <b>HIPPO</b> | <b>EXPT</b> | <b>% Error</b> |
|-------------|--------------|-------------|----------------|
| 248.15      | -7.348       | -9.559      | -23.13         |
| 250.15      | -6.673       | -8.378      | -20.35         |
| 253.15      | -5.722       | -6.606      | -13.38         |
| 258.15      | -4.288       | -4.503      | -4.77          |
| 260.15      | -3.763       | -3.871      | -2.79          |
| 263.15      | -3.021       | -2.924      | 3.32           |
| 268.15      | -1.900       | -1.686      | 12.69          |
| 270.15      | -1.487       | -1.260      | 18.02          |
| 273.15      | -0.904       | -0.681      | 32.75          |
| 277.15      | -0.186       | 0.003       | -              |
| 280.15      | 0.313        | 0.460       | -31.96         |
| 283.15      | 0.780        | 0.880       | -11.36         |
| 288.15      | 1.499        | 1.509       | -0.66          |
| 290.15      | 1.767        | 1.740       | 1.55           |
| 293.15      | 2.152        | 2.068       | 4.06           |
| 298.15      | 2.750        | 2.572       | 6.92           |
| 300.15      | 2.976        | 2.761       | 7.79           |
| 303.15      | 3.301        | 3.032       | 8.87           |
| 308.15      | 3.815        | 3.457       | 10.36          |
| 310.15      | 4.011        | 3.619       | 10.83          |
| 313.15      | 4.296        | 3.853       | 11.50          |
| 318.15      | 4.751        | 4.225       | 12.45          |
| 320.15      | 4.925        | 4.367       | 12.78          |
| 323.15      | 5.182        | 4.575       | 13.27          |
| 328.15      | 5.595        | 4.910       | 13.95          |
| 330.15      | 5.755        | 5.040       | 14.19          |
| 333.15      | 5.992        | 5.231       | 14.55          |
| 336.15      | 6.225        | 5.417       | 14.92          |
| 338.15      | 6.378        | 5.539       | 15.15          |
| 340.15      | 6.529        | 5.660       | 15.35          |
| 343.15      | 6.755        | 5.837       | 15.73          |
| 348.15      | 7.126        | 6.128       | 16.29          |
| 350.15      | 7.272        | 6.242       | 16.50          |
| 353.15      | 7.493        | 6.411       | 16.88          |
| 358.15      | 7.864        | 6.689       | 17.57          |
| 360.15      | 8.012        | 6.799       | 17.84          |
| 363.15      | 8.240        | 6.962       | 18.36          |
| 368.15      | 8.628        | 7.233       | 19.29          |
| 370.15      | 8.788        | 7.340       | 19.73          |
| 373.15      | 9.035        | 7.501       | 20.45          |

**Table S12.** Liquid-Vapor Interface Surface Tension (mJ/m<sup>2</sup>) vs. Temperature (K)

| <b>TEMP</b> | <b>HIPPO</b> | <b>EXPT</b> | <b>% Error</b> |
|-------------|--------------|-------------|----------------|
| 248.15      | 84.65        | 79.19       | 6.89           |
| 258.15      | 83.16        | 77.82       | 6.86           |
| 268.15      | 80.84        | 76.42       | 5.78           |
| 278.15      | 78.47        | 74.95       | 4.70           |
| 288.15      | 78.44        | 73.50       | 6.72           |
| 298.15      | 74.92        | 71.99       | 4.07           |
| 308.15      | 75.17        | 70.41       | 6.76           |
| 318.15      | 70.35        | 68.78       | 2.28           |
| 328.15      | 73.02        | 67.10       | 8.82           |
| 338.15      | 66.70        | 65.36       | 2.05           |
| 348.15      | 66.53        | 63.58       | 4.64           |
| 358.15      | 61.96        | 61.75       | 0.34           |
| 368.15      | 60.56        | 59.87       | 1.15           |
| 378.15      | 56.73        | 57.94       | -2.09          |
| 388.15      | 55.31        | 55.97       | -1.18          |
| 408.15      | 49.69        | 51.89       | -4.24          |
| 418.15      | 50.07        | 49.80       | 1.01           |
| 438.15      | 38.16        | 45.49       | -16.11         |
| 458.15      | 36.94        | 41.07       | -10.06         |

**Table S13.** Liquid Water Density (kg/m<sup>3</sup>) vs. Pressure (Atm)

| <b>PRESSURE</b> | <b>HIPPO</b> | <b>EXPT</b> | <b>% Error</b> |
|-----------------|--------------|-------------|----------------|
| 1               | 996.49       | 997.04      | 0.01           |
| 99              | 1001.36      | 1001.50     | -0.01          |
| 495             | 1019.73      | 1016.12     | 0.41           |
| 1012            | 1040.66      | 1038.83     | 0.38           |
| 1973            | 1077.19      | 1070.66     | 0.70           |
| 2965            | 1108.49      | 1100.11     | 0.85           |
| 3967            | 1135.89      | 1126.13     | 0.99           |
| 4929            | 1159.44      | 1149.43     | 0.98           |
| 7125            | 1205.45      | 1193.32     | 1.12           |
| 9375            | 1244.37      | 1234.57     | 0.92           |

**Table S14.** Water Second Virial Coefficient (L/mol) vs. Temperature (K)

| TEMP   | EXPT    | HIPPO       |                    |                  |         |
|--------|---------|-------------|--------------------|------------------|---------|
|        |         | $B_{cl}(T)$ | $\Delta B_{trans}$ | $\Delta B_{rot}$ | $B(T)$  |
| 298.15 | -1.1158 | -1.2911     | 0.0024             | 0.0275           | -1.2612 |
| 310.15 | -0.9733 | -1.0549     | 0.0018             | 0.0203           | -1.0328 |
| 320.15 | -0.8489 | -0.9038     | 0.0014             | 0.0160           | -0.8863 |
| 340.15 | -0.6594 | -0.6850     | 0.0009             | 0.0104           | -0.6736 |
| 360.15 | -0.5253 | -0.5378     | 0.0006             | 0.0071           | -0.5301 |
| 380.15 | -0.4281 | -0.4344     | 0.0004             | 0.0050           | -0.4289 |
| 400.15 | -0.3559 | -0.3590     | 0.0003             | 0.0037           | -0.3550 |
| 423.15 | -0.2940 | -0.2951     | 0.0002             | 0.0027           | -0.2922 |
| 473.15 | -0.2062 | -0.2057     | 0.0001             | 0.0015           | -0.2041 |
| 523.15 | -0.1535 | -0.1528     | 0.0001             | 0.0009           | -0.1518 |
| 573.15 | -0.1185 | -0.1185     | 0.0001             | 0.0006           | -0.1179 |
| 623.15 | -0.0937 | -0.0949     | 0.0000             | 0.0004           | -0.0945 |
